# Supplementary material for: LIFANA – toward developing a meal recommender system as a dietary support app for the elderly
Source: Atypon-hosted journal article supplement (doi:10.1024/0300-9831/a000795), 2023-10-25
Supplement: 0300-9831_a000795_esm1.pdf [file 0300-9831_a000795_esm1.pdf]

## Electronic Supplementary Material 1

**Table E1.** Qualitative feedback on usability, functionality and experience reported in the Netherlands (NL, n=24 subjects at study onset) and Portugal (PT, timepoints T=0 and T=8 months).

| Criteria             |    | Positive aspects                                                                                                                                                                                                                                                                                                                               | Negative aspects                                                                                                                                                                                                                                                                                                                                                                                                                                                                                                                                                                                                                                                                                                                                                                                                                                                                                                                                                                        |
|----------------------|----|------------------------------------------------------------------------------------------------------------------------------------------------------------------------------------------------------------------------------------------------------------------------------------------------------------------------------------------------|-----------------------------------------------------------------------------------------------------------------------------------------------------------------------------------------------------------------------------------------------------------------------------------------------------------------------------------------------------------------------------------------------------------------------------------------------------------------------------------------------------------------------------------------------------------------------------------------------------------------------------------------------------------------------------------------------------------------------------------------------------------------------------------------------------------------------------------------------------------------------------------------------------------------------------------------------------------------------------------------|
| Usability and Design | NL | <ul style="list-style-type: none"> <li>• Use of smartphone</li> <li>• Easy to find the functionalities in the app.</li> <li>• Pleasant design and clear colours.</li> <li>• Good font size.</li> <li>• Nice photo's for some meals.</li> </ul>                                                                                                 | <ul style="list-style-type: none"> <li>• Installation of the app difficult or impossible without technical support.</li> <li>• Login problems, e.g. password is forgotten</li> <li>• Error messages while using app, e.g. while creating a meal plan.</li> <li>• Need to share personal information before being able to install app.</li> </ul>                                                                                                                                                                                                                                                                                                                                                                                                                                                                                                                                                                                                                                        |
|                      | PT |                                                                                                                                                                                                                                                                                                                                                | <ul style="list-style-type: none"> <li>• Incomplete translation, e.g. "add ingrediente".</li> </ul>                                                                                                                                                                                                                                                                                                                                                                                                                                                                                                                                                                                                                                                                                                                                                                                                                                                                                     |
| Meal planning        | NL | <ul style="list-style-type: none"> <li>• Being able to include restrictions.</li> <li>• Being able to choose which meals and which days to plan.</li> <li>• Being able to see nutritional information.</li> <li>• Following the plan gives the user more structure (less snacking).</li> <li>• Stimulates to eat more varied foods.</li> </ul> | <ul style="list-style-type: none"> <li>• Unhealthy recommendations e.g. too many sugars.</li> <li>• No function to choose number of people eating (partner or number of guests).</li> <li>• No explanation on why recommended meals are considered healthy.</li> <li>• Strange distasteful recommendations, e.g. taugé for snack or two different soups for diner.</li> <li>• Manufactured products and brand names recommended.</li> <li>• Incomprehensible description of ingredients to prepare meal e.g. 'uien rauw' and 'marg.'</li> <li>• Same diner suggestion for couple of days in a row.</li> <li>• Filling in restrictions take a lot of time because of too many options.</li> <li>• Not being able to exclude food groups completely e.g. 'tomato' (instead: tomato juice, tomato raw, tomato vegetable soup).</li> <li>• Not practical to prepare every meal separately and to buy list of ingredients for each meal, this causes food waste and is expensive.</li> </ul> |
|                      |    |                                                                                                                                                                                                                                                                                                                                                |                                                                                                                                                                                                                                                                                                                                                                                                                                                                                                                                                                                                                                                                                                                                                                                                                                                                                                                                                                                         |

- 
- No seasonal vegetables and meals.
  - Recommendations do not fit eating habits e.g. bread for lunch desired instead of warm meal.
  - Not really personalized, e.g. not considering taste, culture, budget.
  - No advice based on professional nutritionists and allergists.
  - Recipes are described in more detail on Voedingscentrum app.
  - Tea and water are not recommended.

---

PT

- Suggestions made for breakfast are not the most suitable. Example: "Toast with Serra cheese" or "Toast with ham".
  - Food restrictions. Foods added to restrictions still appear in the suggestions; existing meal plans are not updated.
  - Absence of alternatives to some suggested meals.
  - Sweets suggested for supper. The alternative was sweets with fruit.
  - App suggests 5 pieces of fruit per day.
  - No suggestions of dried fruits (nuts, hazelnut, almond).
  - Repetitions: There are days when the application suggests the same meals to lunch and dinner. Examples: duck at both meals or squids for both meals or same soup and fish for both meals.
  - Similar protein sources on the same day and several times a week (chicken and turkey).
  - Workday suggestions: The app suggests too elaborated meals during the workdays, which isn't very practical.
  - Seasonal fruits do not appear.
  - Too many breaded foods in the same week (turkey and hake filet).
-

|                                     |    |                                                                                                                                                                                                                                                                                                                                                                           |                                                                                                                                                                                                                                                                                                                                                                                                                                                                                                                                      |
|-------------------------------------|----|---------------------------------------------------------------------------------------------------------------------------------------------------------------------------------------------------------------------------------------------------------------------------------------------------------------------------------------------------------------------------|--------------------------------------------------------------------------------------------------------------------------------------------------------------------------------------------------------------------------------------------------------------------------------------------------------------------------------------------------------------------------------------------------------------------------------------------------------------------------------------------------------------------------------------|
| <b>Shopping list</b>                | NL | <ul style="list-style-type: none"> <li>• Easy to consult and to delete ingredients from list.</li> <li>• Easy to send list to someone.</li> </ul>                                                                                                                                                                                                                         | <ul style="list-style-type: none"> <li>• Errors in opening shopping list</li> <li>• Very long list of ingredients</li> <li>• Ingredients on shopping list which cannot be bought in recommended amount.</li> </ul>                                                                                                                                                                                                                                                                                                                   |
| <b>Educational content</b>          | NL | <ul style="list-style-type: none"> <li>• Nice to see tips for maintaining a healthy lifestyle.</li> </ul>                                                                                                                                                                                                                                                                 | <ul style="list-style-type: none"> <li>• Educational content is specific for malnutrition while being overweight is more of an issue.</li> <li>• Give more easy tips that could be recommended for everyone.</li> <li>• Keep an eye on changing behaviour and specify the advice on that.</li> </ul>                                                                                                                                                                                                                                 |
| <b>User Experience and Emotions</b> | NL | <ul style="list-style-type: none"> <li>• Positive motivation to think about nutrition and current habits on nutrition and physical exercises.</li> <li>• Motivated to contribute to development of a new app.</li> <li>• Surprised about the effort behind LIFANA on specifying nutritional values of each ingredient (after informing participants verbally).</li> </ul> | <ul style="list-style-type: none"> <li>• Negative first experience with LIFANA due to installation and login problems.</li> <li>• Frustration of errors and inaccuracy of recommendations.</li> <li>• Disappointment because nutrition app doesn't meet expectations: app makes me unhealthy (recipes suggest use of processed foods and sweets).</li> <li>• Frustration because of lack of improvement despite giving feedback.</li> <li>• Suspicious on purpose of test and project (e.g. sponsored by food industry?).</li> </ul> |
